# Supplementary material
Source: HighWire-hosted journal article supplement (https://bmjopen.bmj.com/content/15/6/e094240)
Supplement: inline-supplementary-material-1 [file inline-supplementary-material-1.pdf]

Table S1. Correlation analysis

|                       | Stroke knowledge   | Stroke attitude    | Pre hospital attitude |
|-----------------------|--------------------|--------------------|-----------------------|
| Stroke knowledge      | 1                  |                    |                       |
| Stroke attitude       | 0.2262 (P < 0.001) | 1                  |                       |
| Pre hospital attitude | 0.0499 (P= 0.2552) | 0.1305 (P= 0.0028) | 1                     |

Table S2. SEM results

|                            |      |                            | Estimate | P      |
|----------------------------|------|----------------------------|----------|--------|
| Stroke attitude            | <--- | Stroke knowledge           | 0.10     | <0.001 |
| Prehospital delay attitude | <--- | Stroke knowledge           | 0.11     | 0.048  |
| Prehospital delay          | <--- | Stroke attitude            | 0.01     | 0.17   |
| Prehospital delay          | <--- | Prehospital delay attitude | -0.01    | <0.001 |
| Prehospital delay          | <--- | Stroke knowledge           | 0.00     | 0.271  |

**Table S3.** Fit indices of SEM

| Indicators | Reference  | Results |
|------------|------------|---------|
| RMSEA      | <0.08 Good | 0.154   |
| SRMR       | <0.08 Good | 0.043   |
| TLI        | >0.8 Good  | 0.041   |
| CFI        | >0.8 Good  | 0.840   |
