# Supplementary material
Source: HighWire-hosted journal article supplement (https://bmjopen.bmj.com/content/15/6/e094240)
Supplement: inline-supplementary-material-2 [file inline-supplementary-material-2.pdf]

## Survey questionnaire on the current status of knowledge and attitudes of stroke patients

Dear Sir (Madam):

We are researchers from Taizhou Hospital, Zhejiang Province. We sincerely invite you to participate in our research project. This study is entitled “*The knowledge and attitude toward stroke and prehospital delay among patients and their family members under high prehospital delay*”, to serve as the basis for developing scientific intervention strategies, which may help many others in the future to improve their health conditions. Your participation in this research is entirely voluntary, and the hospital's Ethics Review Committee has approved the study. Should you choose to participate, kindly review the instructions below:

1. Please complete the enclosed questionnaire. There are no correct or incorrect answers; simply answer based on your personal experiences. Should you have any questions during this process, do not hesitate to contact us. We kindly request that you submit the questionnaire as soon as you have completed it.

2. This research involves a straightforward survey that will not harm your physical or mental health. However, it does require some personal information, such as your gender and age. We assure you that we will uphold the strictest confidentiality and will not disclose your information.

3. As a participant, you are entitled to access all information and updates related to this study. If at any point you choose to withdraw from the study, please inform us, and we will exclude your data from the results.

We deeply appreciate your willingness to contribute to our research amidst your busy schedule. Thank you! Completion and submission of the questionnaire will be considered as informed consent and no separate informed consent form should be signed.

Taizhou Hospital, Zhejiang Province  
Contact: Feng Lin  
Tel: 13706765803

## Part I-Basic information

1. You are:

☐ a Patient himself/herself☐ b Patient's family

2. Your gender:

☐ a Male☐ b Female

3. Your age: ( ) years.

Fill in numbers only (integers)

---

4. Your education:

☐ a Junior high school and below☐ b High school/secondary school☐ c College☐ d Undergraduate☐ e Postgraduate and above

5. Your marital status:

☐ a Married☐ b Unmarried☐ c Divorced☐ d Widowed

6. Your working state:

- |                                   |                                                           |                                                      |                                                |                                 |
|-----------------------------------|-----------------------------------------------------------|------------------------------------------------------|------------------------------------------------|---------------------------------|
| <input type="radio"/> an Employed | <input type="radio"/> b Part-time/self-employed/freelance | <input type="radio"/> c Inactive/unemployed/laid off | <input type="radio"/> d Full-time husband/wife | <input type="radio"/> e Retired |
| <input type="radio"/> f Student   |                                                           |                                                      |                                                |                                 |

7. In the past year, your per capita monthly household income (including in-kind income and rent, etc.) was ( ) Yuan

☐ a <2000☐ b 2000-5000☐ c 5000-10000☐ d 10000-20000☐ e >20000

8. Does the patient have a co-inhabitant?

- ☐a Yes
- ☐b No

9. Medical insurance type

- ☐Social medical insurance only (e.g. Employee Insurance, New Rural Cooperative Insurance, Urban Resident Insurance, etc.)
- ☐Commercial insurance only
- ☐Both social medical insurance and commercial insurance
- ☐No insurance or uninsured

10. Has anyone in your family other than the patient ever had a stroke ?

- ☐a Yes
- ☐b No

11. Are you/the patient part of "wake-up stroke" (asymptomatic when asleep, symptoms noticed upon waking)?

- ☐a Yes
- ☐b No

12. Was the first medical facility you sought care from a comprehensive stroke center?

- ☐a Yes
- ☐b No

13. When you first noticed symptoms in yourself/the patient, how panicked were you at that time?

- ☐1 point means no panic

☐2

☐3

☐4

☐5

☐6

☐7

☐8

☐9

☐10 points means extreme panic

14. The patient's NIHSS score on admission ( )

To be filled in by medical staff

---

15. Have you had any surgery during this hospitalization ( )?

(To be filled in by medical staff) Delay in seeking medical attention is defined as an interval of >3 hours between the moment the patient or someone else first noticed symptoms and the time of transport to the hospital.

☐a Thrombolysis

☐b Thrombectomy

☐c None

16. Did the patient exhibit delayed medical care behavior ( )?

(To be filled in by medical staff) Delay in seeking medical attention is defined as an interval of >3 hours between the moment the patient or someone else first noticed symptoms and the time of transport to the hospital.

☐a Yes

☐b No

Part-II Knowledge of stroke

1. Stroke is very common in the elderly, and once it occurs, it can cause damage to the brain, with severe cases potentially leading to death.

☐a. Very familiar

☐b. Heard of

☐c. Not clear

2. Stroke exhibits significant seasonality, with higher incidence rates during cold seasons.

The peak onset within a day usually occurs around the time close to noon.

☐a. Very familiar

☐b. Heard of

☐c. Not clear

3. Are you familiar with the "BEFAST principle" for early identification of stroke?

- ☐a.Very familiar
- ☐b.Heard of
- ☐c.Not clear

4. Are you familiar with the "Stroke 120 mnemonic" for early identification of stroke?

- ☐a.Very familiar
- ☐b.Heard of
- ☐c.Not clear

5. Are you aware that there is a Stroke First Aid Map in China?

- ☐a.Very familiar
- ☐b.Heard of
- ☐c.Not clear

6.Based on your knowledge, are any of the following symptoms associated with stroke?  
[Matrix single-choice question]

|                                       | Yes                   | No                    | Uncertain             |
|---------------------------------------|-----------------------|-----------------------|-----------------------|
| 6.1 Numbness                          | <input type="radio"/> | <input type="radio"/> | <input type="radio"/> |
| 6.2 Facial asymmetry                  | <input type="radio"/> | <input type="radio"/> | <input type="radio"/> |
| 6.3 Unclear speech/inability to speak | <input type="radio"/> | <input type="radio"/> | <input type="radio"/> |
| 6.4 Drooling                          | <input type="radio"/> | <input type="radio"/> | <input type="radio"/> |
| 6.5 Paralysis                         | <input type="radio"/> | <input type="radio"/> | <input type="radio"/> |
| 6.6 Falling to one side               | <input type="radio"/> | <input type="radio"/> | <input type="radio"/> |
| 6.7 Dizziness                         | <input type="radio"/> | <input type="radio"/> | <input type="radio"/> |

|                                           |                       |                       |                       |
|-------------------------------------------|-----------------------|-----------------------|-----------------------|
| 6.8 Weakness                              | <input type="radio"/> | <input type="radio"/> | <input type="radio"/> |
| 6.9 Eating difficulties                   | <input type="radio"/> | <input type="radio"/> | <input type="radio"/> |
| 6.10 Swallowing difficulties              | <input type="radio"/> | <input type="radio"/> | <input type="radio"/> |
| 6.11 Sudden one-sided blindness           | <input type="radio"/> | <input type="radio"/> | <input type="radio"/> |
| 6.12 Shed tears                           | <input type="radio"/> | <input type="radio"/> | <input type="radio"/> |
| 6.13 Confused thinking                    | <input type="radio"/> | <input type="radio"/> | <input type="radio"/> |
| 6.14 Stabbing pain                        | <input type="radio"/> | <input type="radio"/> | <input type="radio"/> |
| 6.15 Headache/earache                     | <input type="radio"/> | <input type="radio"/> | <input type="radio"/> |
| 6.16 Crooked mouth                        | <input type="radio"/> | <input type="radio"/> | <input type="radio"/> |
| 6.17 Sudden loss of consciousness         | <input type="radio"/> | <input type="radio"/> | <input type="radio"/> |
| 6.18 One-sided limb paralysis             | <input type="radio"/> | <input type="radio"/> | <input type="radio"/> |
| 6.19 Sudden walking difficulties, falling | <input type="radio"/> | <input type="radio"/> | <input type="radio"/> |

Part-III Attitudes toward stroke

[Matrix single-choice question]

|                                                                                                                                                                 | a.<br>Strongly<br>agree | b. Agree              | c.<br>Neutral         | d.<br>Disagree        | e.<br>Strongly<br>disagree |
|-----------------------------------------------------------------------------------------------------------------------------------------------------------------|-------------------------|-----------------------|-----------------------|-----------------------|----------------------------|
| 1.I am extremely concerned about the impact of stroke on my/ the patient's health and quality of life.                                                          | <input type="radio"/>   | <input type="radio"/> | <input type="radio"/> | <input type="radio"/> | <input type="radio"/>      |
| 2.I worry that I/ the patient may not be able to return to the previous state of life and may even require long-term care from others, which makes me feel sad. | <input type="radio"/>   | <input type="radio"/> | <input type="radio"/> | <input type="radio"/> | <input type="radio"/>      |

|                                                                                                                                                 |                       |                       |                       |                       |                       |
|-------------------------------------------------------------------------------------------------------------------------------------------------|-----------------------|-----------------------|-----------------------|-----------------------|-----------------------|
| 3.I am very concerned about the possibility of a recurrence and am determined to take necessary measures to prevent it from happening again.    | <input type="radio"/> |
| 4.I would actively seek to learn more about stroke-related knowledge.                                                                           | <input type="radio"/> |
| 5.I hope to receive faster and higher-quality medical services during the treatment process.                                                    | <input type="radio"/> |
| 6.I hope that more stroke centers will be established to provide comprehensive emergency and rehabilitation guidance.                           | <input type="radio"/> |
| 7.Although the stroke first aid map is good, areas with relatively weak basic medical facilities and limited medical resources may not benefit. | <input type="radio"/> |

Part IV-Attitudes towards delayed medical care for stroke  
[Matrix single-choice question]

Do you think that any of the following reasons or thoughts could make the stroke patients delay in seeking medical attention?

|                                                                              | a. Very consistent    | b. Somewhat consistent | c. Neutral            | d. Not consistent     | e. Not consistent at all |
|------------------------------------------------------------------------------|-----------------------|------------------------|-----------------------|-----------------------|--------------------------|
| 1.Fear that going to the hospital may not lead to a return to the pre-stroke | <input type="radio"/> | <input type="radio"/>  | <input type="radio"/> | <input type="radio"/> | <input type="radio"/>    |

|                                                                                                  |   |   |   |   |   |
|--------------------------------------------------------------------------------------------------|---|---|---|---|---|
| state.                                                                                           |   |   |   |   |   |
| 2. Hassle of going to the hospital (such as distance, bad weather).                              | ○ | ○ | ○ | ○ | ○ |
| 3.Concern about adding burden to the family.                                                     | ○ | ○ | ○ | ○ | ○ |
| 4.At an older age, some discomfort is considered normal.                                         | ○ | ○ | ○ | ○ | ○ |
| 5.Usually in good health, and there's nothing serious.                                           | ○ | ○ | ○ | ○ | ○ |
| 6.Prefer to rest first, observe, and decide; if symptoms don't improve, then go to the hospital. | ○ | ○ | ○ | ○ | ○ |
| 7.No one around to help, so have to wait.                                                        | ○ | ○ | ○ | ○ | ○ |
| 8.Calling an ambulance is costly.                                                                | ○ | ○ | ○ | ○ | ○ |
| 9.In an emergency, may forget to call an ambulance.                                              | ○ | ○ | ○ | ○ | ○ |
| 10.In a hurry, taken to the nearest non-comprehensive stroke center, causing delays in           | ○ | ○ | ○ | ○ | ○ |



|           |  |  |  |  |  |
|-----------|--|--|--|--|--|
| transfer. |  |  |  |  |  |
|-----------|--|--|--|--|--|

This data information was obtained from ( )

- Taizhou Hospital (Main Campus)
- Taizhou Hospital (East Campus)
- Enze Hospital
- Rehabilitation Hospital
